# Supplementary material for: Keloid-Specific Gene Expression Profiling for Accurate Diagnostic and Therapeutic Applications
Source: Research Square preprint supplement (doi:10.21203/rs.3.rs-1104408/v1), 2021-12-17
Supplement: Supplementary file 1 [file 86a7a1c0b9499d7872faba4c.docx]

Table I. GO Biological Process enrichment result for Down regulated DEGs in Keloid VS Reversible Scars

| GO ID | Term | Overlap | Adjusted  P-value | Genes |
| --- | --- | --- | --- | --- |
| GO:0002253 | activation of immune response | 20/487 | 0.000138 | CD86, HLA-DRB5, FCER1G, CTSS, PYCARD, FCGR3A, FCGR2A, C3AR1, HLA-DPB1, CDK1, TLR8, HLA-DRA, CD36, VSIG4, PIK3AP1, FCGR1A, HLA-DRB1, CTSB, C1QC, HLA-DPA1 |
| GO:0048002 | antigen processing and presentation of peptide antigen | 12/185 | 0.000228 | BCAP31, CD74, HLA-DRB5, FCER1G, HLA-DPB1, HLA-DRA, CD36, FCGR1A, HLA-DRB1, CTSS, PSMA7, HLA-DPA1 |
| GO:0016064 | immunoglobulin mediated immune response | 16-May | 0.000228 | CD74, FCER1G, TLR8, FCGR1A, HLA-DRB1 |
| GO:0006954 | inflammatory response | 16/376 | 0.000337 | IL10, CCL13, CD163, SERPINA1, TNFAIP6, LY86, LYZ, AIF1, PYCARD, C3AR1, SPP1, BDKRB2, TLR8, CCL18, FCGR1A, HLA-DRB1 |
| GO:0002478 | antigen processing and presentation of exogenous peptide antigen | 11/171 | 0.000337 | CD74, HLA-DRB5, FCER1G, HLA-DPB1, HLA-DRA, CD36, FCGR1A, HLA-DRB1, CTSS, PSMA7, HLA-DPA1 |
| GO:0019884 | antigen processing and presentation of exogenous antigen | 11/173 | 0.000337 | CD74, HLA-DRB5, FCER1G, HLA-DPB1, HLA-DRA, CD36, FCGR1A, HLA-DRB1, CTSS, PSMA7, HLA-DPA1 |
| GO:0019724 | B cell mediated immunity | 5/20 | 0.000337 | CD74, FCER1G, TLR8, FCGR1A, HLA-DRB1 |
|  |  |  |  |  |
| GO:1903034 | regulation of response to wounding | 15/347 | 0.000346 | IL10, FCER1G, SCARA5, CMA1, CAV1, PLA2G7, F3, CTSS, FABP4, ALOX5AP, SPP1, CD36, PIK3AP1, FCGR1A, HLA-DRB1 |
| GO:0002757 | immune response-activating signal transduction | 17/440 | 0.000346 | CD86, HLA-DRB5, FCER1G, CTSS, FCGR3A, FCGR2A, C3AR1, HLA-DPB1, CDK1, TLR8, HLA-DRA, CD36, PIK3AP1, FCGR1A, HLA-DRB1, CTSB, HLA-DPA1 |
| GO:0050863 | regulation of T cell activation | 13/259 | 0.000346 | IL10, CD86, CD74, HLA-DRB5, CAV1, AIF1, PYCARD, HLA-DPB1, HLA-DRA, VSIG4, IL7R, HLA-DRB1, HLA-DPA1 |

Table II. KEGG Pathway enrichment result for Down regulated DEGs in Keloid VS Reversible Scars

| Term | Overlap | Adjusted P-value | Genes |
| --- | --- | --- | --- |
| Systemic lupus erythematosus | 25/133 | 3.21E-25 | CD86, HIST1H2BM, HIST1H2BO, FCGR3A, HIST1H3A, HIST1H3H, HIST1H3B, FCGR1A, HIST1H2AB, HLA-DPA1, HIST1H2AM, IL10, HLA-DRB5, HIST1H4L, HIST1H2AJ, HIST1H4A, HIST1H4B, FCGR2A, HIST4H4, HLA-DPB1, HLA-DRA, HIST1H2BH, HIST1H4C, HLA-DRB1, C1QC |
| Staphylococcus aureus infection | 12/68 | 2.37E-12 | IL10, FCGR3A, HLA-DRB5, FCGR2A, C3AR1, HLA-DPB1, HLA-DRA, FPR3, FCGR1A, HLA-DRB1, HLA-DPA1, C1QC |
| Alcoholism | 15/180 | 2.76E-10 | HIST1H2AM, HIST1H2BM, HIST1H2BO, MAOB, HIST1H4L, HIST1H2AJ, HIST1H4A, HIST1H3A, HIST1H4B, HIST4H4, HIST1H2BH, HIST1H3H, HIST1H3B, HIST1H4C, HIST1H2AB |
| Antigen processing and presentation | 10/77 | 3.83E-09 | CD74, HLA-DRB5, HLA-DPB1, HLA-DRA, HSPA2, CTSS, HSPA1B, HLA-DRB1, CTSB, HLA-DPA1 |
| Asthma | 31-Jul | 1.62E-08 | IL10, HLA-DRB5, FCER1G, HLA-DPB1, HLA-DRA, HLA-DRB1, HLA-DPA1 |
| Tuberculosis | 13/179 | 2.33E-08 | IL10, CD74, HLA-DRB5, FCER1G, CTSS, FCGR3A, FCGR2A, HLA-DPB1, HLA-DRA, FCGR1A, ATP6V0C, HLA-DRB1, HLA-DPA1 |
| Phagosome | 12/152 | 3.25E-08 | MSR1, HLA-DRB5, FCGR3A, FCGR2A, HLA-DPB1, HLA-DRA, CD36, FCGR1A, ATP6V0C, HLA-DRB1, CTSS, HLA-DPA1 |
| Leishmaniasis | 9/74 | 4.23E-08 | IL10, FCGR3A, HLA-DRB5, FCGR2A, HLA-DPB1, HLA-DRA, FCGR1A, HLA-DRB1, HLA-DPA1 |
| Allograft rejection | 7/38 | 7.35E-08 | CD86, IL10, HLA-DRB5, HLA-DPB1, HLA-DRA, HLA-DRB1, HLA-DPA1 |
| Intestinal immune network for IgA production | 7/48 | 3.95E-07 | CD86, IL10, HLA-DRB5, HLA-DPB1, HLA-DRA, HLA-DRB1, HLA-DPA1 |

Table III. GO Biological Process enrichment result for Up regulated DEGs in Keloid VS Reversible Scars

| GO ID | Term | Overlap | Adjusted P-value | Genes |
| --- | --- | --- | --- | --- |
| GO:0050953 | sensory perception of light stimulus | 13/198 | 0.0111 | TULP1, RPGR, COL1A1, RP1L1, OCLM, RIMS1, CACNB2, RP1, GRM8, SIX3, CNGB3, PPEF2, GPR179 |
| GO:0007601 | visual perception | 13/195 | 0.0111 | TULP1, RPGR, COL1A1, RP1L1, OCLM, RIMS1, CACNB2, RP1, GRM8, SIX3, CNGB3, PPEF2, GPR179 |
| GO:0007600 | sensory perception | 20/457 | 0.0170 | TAS2R60, EYA1, COL11A2, CACNA1D, TULP1, SLC6A3, RPGR, COL1A1, RP1L1, OCLM, CACNB2, RIMS1, RP1, MYO15A, GRM8, SIX3, CNGB3, ASIC3, PPEF2, GPR179 |
| GO:0031960 | response to corticosteroid | 10/140 | 0.0278 | COL1A1, MSTN, UCN2, WNT7B, BCKDHB, PDX1, GRIK4, FOSB, FOS, SOX30 |
| GO:0048666 | neuron development | 9/121 | 0.0380 | ALK, ROBO2, TMC1, RP1L1, RP1, TULP1, HOXD10, GLI2, RPGR |
| GO:0070588 | calcium ion transmembrane transport | 9/128 | 0.0487 | TMC1, CACNB2, RYR2, CACNG8, IL1RAPL1, CACNA1B, CACNA1D, ATP2A1, TRPM4 |
| GO:0033275 | actin-myosin filament sliding | 5/38 | 0.0551 | MYH2, ACTN2, MYH8, MYH4, MYH7 |
| GO:0030049 | muscle filament sliding | 5/38 | 0.0551 | MYH2, ACTN2, MYH8, MYH4, MYH7 |
| GO:0042391 | regulation of membrane potential | 13/266 | 0.0551 | RYR2, KCNE2, ACTN2, CACNA1B, CACNA1D, GRIK2, RIMS1, NETO1, GJA5, CHRNE, CNGB3, TRPM4, SHANK1 |
| GO:0007215 | glutamate receptor signaling pathway | 5/40 | 0.0634 | GRM5, GRM8, GRIK4, GRIK2, CDK5R1 |

Table IV. KEGG Pathway enrichment result for Up regulated DEGs in Keloid VS Reversible Scars

| Term | Overlap | Adjusted P-value | Genes |
| --- | --- | --- | --- |
| Protein digestion and absorption | 8/90 | 0.0125 | COL1A1, COL27A1, MEP1B, COL22A1, COL7A1, COL11A2, ATP1B4, SLC16A10 |
| Insulin secretion | 6/86 | 0.0601 | RYR2, CCKAR, PDX1, ATP1B4, CACNA1D, TRPM4 |
| Primary bile acid biosynthesis | 3/17 | 0.0601 | CYP46A1, BAAT, CYP7A1 |
| Cardiac muscle contraction | 6/78 | 0.0601 | RYR2, CACNB2, CACNG8, ATP1B4, CACNA1D, MYH7 |
| Hypertrophic cardiomyopathy (HCM) | 6/85 | 0.0601 | RYR2, CACNB2, CACNG8, ITGA2B, CACNA1D, MYH7 |
| Arrhythmogenic right ventricular cardiomyopathy (ARVC) | 6/72 | 0.0601 | RYR2, CACNB2, CACNG8, ACTN2, ITGA2B, CACNA1D |
| Dilated cardiomyopathy (DCM) | 6/91 | 0.0685 | RYR2, CACNB2, CACNG8, ITGA2B, CACNA1D, MYH7 |
| Glutamatergic synapse | 6/114 | 0.166 | GRM5, GRM8, GRIK4, CACNA1D, GRIK2, SHANK1 |
| Calcium signaling pathway | 8/188 | 0.166 | RYR2, GRM5, CCKAR, PLCZ1, CACNA1B, CACNA1D, ATP2A1, MYLK3 |
| Taurine and hypotaurine metabolism | 2/11 | 0.200 | GADL1, BAAT |

Table V. GO Biological Process enrichment result for UF pattern of DEGs

| GO ID | Term | Overlap | Adjusted P-value | Genes |
| --- | --- | --- | --- | --- |
| GO:0043062 | extracellular structure organization | 15/360 | 2.97E-08 | ITGB1, POSTN, OLFML2B, TGFB3, PLOD2, NID2, GDF5, ADAMTS4, ACAN, MMP14, ADAMTS14, BMP1, ITGA10, SH3PXD2B, EMILIN1 |
| GO:0030198 | extracellular matrix organization | 15/359 | 2.97E-08 | ITGB1, POSTN, OLFML2B, TGFB3, PLOD2, NID2, GDF5, ADAMTS4, ACAN, MMP14, ADAMTS14, BMP1, ITGA10, SH3PXD2B, EMILIN1 |
| GO:0010975 | regulation of neuron projection development | 9/275 | 0.00139 | PTPRD, NTRK1, ITGB1, FRMD7, MAP1B, NCS1, NEFL, FAT3, EPHA3 |
| GO:0001501 | skeletal system development | 7/162 | 0.00206 | ADAMTS4, ACAN, POSTN, BMP1, SH3PXD2B, ALPL, PAPSS2 |
| GO:0031344 | regulation of cell projection organization | 10/391 | 0.00206 | PTPRD, NTRK1, ITGB1, FRMD7, TGFB3, MAP1B, NCS1, NEFL, FAT3, EPHA3 |
| GO:0045664 | regulation of neuron differentiation | 10/405 | 0.00233 | PTPRD, NTRK1, ITGB1, FRMD7, MAP1B, NCS1, NEFL, FAT3, GDF5, EPHA3 |
| GO:0031346 | positive regulation of cell projection organization | 7/195 | 0.00427 | PTPRD, NTRK1, ITGB1, TGFB3, MAP1B, NEFL, EPHA3 |
| GO:0010720 | positive regulation of cell development | 9/358 | 0.00428 | PTPRD, NTRK1, ITGB1, TGFB3, MAP1B, SNAI1, NEFL, GDF5, EPHA3 |
| GO:0010976 | positive regulation of neuron projection development | 6/144 | 0.00562 | PTPRD, NTRK1, ITGB1, MAP1B, NEFL, EPHA3 |
| GO:0045666 | positive regulation of neuron differentiation | 7/217 | 0.00562 | PTPRD, NTRK1, ITGB1, MAP1B, NEFL, GDF5, EPHA3 |

Table VI. KEGG Pathway enrichment result for UF pattern of DEGs

| Term | Overlap | Adjusted P-value | Genes |
| --- | --- | --- | --- |
| Hypertrophic cardiomyopathy (HCM) | 4/85 | 0.0363 | ITGB1, RYR2, TGFB3, ITGA10 |
| Dilated cardiomyopathy (DCM) | 4/91 | 0.0363 | ITGB1, RYR2, TGFB3, ITGA10 |
| Arrhythmogenic right ventricular cardiomyopathy (ARVC) | 3/72 | 0.137 | ITGB1, RYR2, ITGA10 |
| Amyotrophic lateral sclerosis (ALS) | 2/51 | 0.476 | NEFL, NEFH |
| Pathogenic Escherichia coli infection | 2/55 | 0.476 | ITGB1, TUBB3 |
| Sulfur metabolism | 1/9 | 0.476 | PAPSS2 |
| Leishmaniasis | 2/74 | 0.476 | ITGB1, TGFB3 |
| Pancreatic cancer | 2/75 | 0.476 | TGFB3, CDKN2A |
| Chronic myeloid leukemia | 2/76 | 0.476 | TGFB3, CDKN2A |
| Axon guidance | 3/181 | 0.476 | SEMA6B, ITGB1, EPHA3 |

Table VII. GO Biological Process enrichment result for DF pattern of DEGs

| GO ID | Term | Overlap | Adjusted P-value | Genes |
| --- | --- | --- | --- | --- |
| GO:0031424 | keratinization | 26/47 | 7.28E-21 | SPRR4, SPRR2E, SPRR2F, SPRR2G, TCHH, PPL, EVPL, LCE1A, LCE1B, LCE3D, CASP14, CDH3, SFN, SPRR2A, SPRR2B, TGM3, CNFN, LCE1F, LOR, LCE1C, LCE1D, LCE2B, KRT17, LCE6A, SPRR1A, IVL |
| GO:0008544 | epidermis development | 35/120 | 1.19E-17 | COL17A1, SPRR2E, SPRR2F, SPRR2G, CALML5, BNC1, KLK5, HOXC13, SOX21, EVPL, CST6, KLK7, KRT83, NTF4, CASP14, SOX9, SPRR2A, SPRR2B, DSP, WNT10A, LAMB3, KDF1, KRT34, KRT31, EDAR, ALDH3A2, LCE2B, DCT, KRT17, FABP5, KRT16, KRT15, KRT14, DNASE1L2, SPRR1A |
| GO:0060429 | epithelium development | 42/256 | 8.96E-12 | SPRR2E, RET, COL17A1, SPRR2F, SPRR2G, FOXC1, CALML5, SDC4, BNC1, KLK5, HOXC13, SOX21, EVPL, CST6, KLK7, KRT83, NTF4, CASP14, CECR2, EPCAM, SOX9, SPRR2A, SPRR2B, DSP, TFAP2B, WNT10A, LAMB3, KDF1, KRT34, KRT31, LCE2B, EDAR, ALDH3A2, BMP2, KRT17, FABP5, DCT, KRT16, KRT15, KRT14, DNASE1L2, SPRR1A |
| GO:0008610 | lipid biosynthetic process | 52/491 | 1.96E-07 | SLC44A5, PECR, TECR, MSMO1, TFCP2L1, PLB1, TM7SF2, FADS2, FADS6, SPTLC3, GGT1, GGT2, CERS4, DGAT2, EDN2, ELOVL4, HMGCS1, ACSL1, ELOVL3, CYP39A1, MVD, FAR2, SLC27A2, CFTR, CDS1, ACSS2, MVK, FAXDC2, INSIG1, ABHD5, HMGCR, CYP3A4, HSD17B8, AGPAT3, HSD11B1, HSD17B2, PIP5K1B, SPTSSB, SDR42E1, FDPS, PLA2G2D, GK, SRD5A1, DHCR24, ALOX15B, FABP5, GPAM, FASN, PNPLA3, DHCR7, DEGS2, LPIN3 |
| GO:0044283 | small molecule biosynthetic process | 45/394 | 2.34E-07 | CDS1, SLC44A5, PECR, ACSS2, MVK, GLS2, FAXDC2, INSIG1, TECR, GPT, MSMO1, HMGCR, CYP3A4, HSD17B8, TM7SF2, FADS2, IMPA2, FADS6, KYNU, GGT1, GGT2, FDPS, EDN2, ELOVL4, PKLR, HMGCS1, GPT2, ELOVL3, BBOX1, DHCR24, UPB1, CYP4F12, ALOX15B, CYP39A1, GATM, BDH1, FABP5, FASN, PADI3, MVD, DHCR7, SLC27A2, CFTR, LPIN3, BCAT2 |
| GO:0042633 | hair cycle | 9/15 | 5.09E-07 | KRT33B, KRTAP4-9, KRTAP4-8, KRTAP4-7, PPP1R13L, KRT16, KRT14, MPZL3, KRT83 |
| GO:0042303 | molting cycle | 9/15 | 5.09E-07 | KRT33B, KRTAP4-9, KRTAP4-8, KRTAP4-7, PPP1R13L, KRT16, KRT14, MPZL3, KRT83 |
| GO:1901617 | organic hydroxy compound biosynthetic process | 26/166 | 1.24E-06 | CDS1, SLC44A5, PMEL, OCA2, MVK, INSIG1, TYRP1, MSMO1, HMGCR, CYP3A4, TM7SF2, IMPA2, FDPS, GPR37, HMGCS1, BBOX1, DHCR24, TYR, CYP39A1, DCT, FABP5, MVD, DHCR7, SLC27A2, CFTR, LPIN3 |
| GO:0006694 | steroid biosynthetic process | 20/108 | 3.94E-06 | SDR42E1, FDPS, MVK, HMGCS1, SRD5A1, INSIG1, MSMO1, DHCR24, TFCP2L1, HMGCR, CYP3A4, HSD17B8, TM7SF2, CYP39A1, HSD11B1, HSD17B2, MVD, DHCR7, SLC27A2, CFTR |
| GO:1901615 | organic hydroxy compound metabolic process | 47/476 | 5.41E-06 | CDS1, SLC44A5, OCA2, PECR, CEBPA, PMEL, ACSS2, MVK, FOXE1, INSIG1, TYRP1, GDPD2, MSMO1, HMGCR, CYP3A4, PLB1, TM7SF2, SDR16C5, PPIP5K1, IMPA2, AWAT2, LRAT, FDPS, PLA2G2D, GPR37, DGAT2, GK, HMGCS1, SORD, BBOX1, DHCR24, TYR, CYP4F12, CYP39A1, ALDH3A2, AKR1B10, FABP5, SOAT1, DCT, PLCH1, MVD, DHCR7, DEGS2, SLC27A2, GPLD1, CFTR, LPIN3 |

Table VIII. KEGG Pathway enrichment result for DF pattern of DEGs

| Term | Overlap | Adjusted P-value | Genes |
| --- | --- | --- | --- |
| Estrogen signaling pathway | 19/137 | 0.000726 | CALML5, TGFA, KRT23, KRT34, CALML3, KRT31, ESR1, KRT33B, KRT33A, KRT18, KRT39, KRT17, KRT16, KRT26, KRT15, KRT36, KRT14, PGR, FKBP5 |
| Terpenoid backbone biosynthesis | 6/22 | 0.0246 | FDPS, MVK, HMGCS1, MVD, HMGCR, ACAT2 |
| Steroid biosynthesis | 5/19 | 0.0346 | SOAT1, DHCR24, MSMO1, DHCR7, TM7SF2 |
| Glycerolipid metabolism | 9/61 | 0.0346 | ALDH3A2, DGAT2, AKR1B10, GK, GPAM, PNPLA3, PNLIPRP3, AGPAT3, LPIN3 |
| Tight junction | 17/170 | 0.0346 | MAP3K1, F11R, PRKCZ, CD1A, TIAM1, SLC9A3R1, EPB41L4B, OCLN, CLDN3, MARVELD2, PPP2R2C, CLDN16, EZR, CFTR, LLGL2, TJP2, CRB3 |
| Synthesis and degradation of ketone bodies | 4/10 | 0.0346 | BDH1, HMGCS1, OXCT2, ACAT2 |
| ECM-receptor interaction | 10/82 | 0.0653 | SDC4, LAMB3, LAMC3, ITGB4, ITGA2, LAMB4, COL4A6, COL4A5, ITGB6, GP6 |
| PPAR signaling pathway | 9/74 | 0.0868 | FADS2, GK, FABP5, ACSL1, FABP7, ME1, SLC27A6, ACSBG1, SLC27A2 |
| Steroid hormone biosynthesis | 8/60 | 0.0868 | SULT2B1, HSD11B1, SULT1E1, SRD5A1, HSD17B2, UGT1A4, CYP3A4, HSD17B8 |
| Pyruvate metabolism | 6/39 | 0.118 | ALDH3A2, ACSS2, PC, PKLR, ME1, ACAT2 |

Table IX. GO Biological Process enrichment result for DU pattern of DEGs

| GO ID | Term | Overlap | Adjusted P-value | Genes |
| --- | --- | --- | --- | --- |
| GO:0009913 | epidermal cell differentiation | 13/76 | 2.68E-08 | CERS3, CSTA, CDSN, SPINK5, OVOL1, POU2F3, FOXN1, TGM1, SCEL, FA2H, ACER1, IRF6, TP63 |
| GO:0050891 | multicellular organismal water homeostasis | 9/32 | 2.27E-07 | CDH1, CYP4F2, SCNN1B, SCNN1A, ALOX12B, ABCA12, CLDN1, ALOXE3, TP63 |
| GO:0030104 | water homeostasis | 9/38 | 8.28E-07 | CDH1, CYP4F2, SCNN1B, SCNN1A, ALOX12B, ABCA12, CLDN1, ALOXE3, TP63 |
| GO:0030216 | keratinocyte differentiation | 10/54 | 8.88E-07 | TGM1, CERS3, SCEL, ACER1, CSTA, CDSN, IRF6, POU2F3, FOXN1, TP63 |
| GO:0008544 | epidermis development | 13/120 | 1.94E-06 | TFAP2C, CDSN, GRHL3, KRT5, FOXN1, POU2F3, KRT9, ACER1, SCEL, GJB5, TGM5, SPRR2D, ZNF750 |
| GO:0033561 | regulation of water loss via skin | 6/19 | 5.36E-05 | CDH1, ALOX12B, ABCA12, CLDN1, ALOXE3, TP63 |
| GO:0060429 | epithelium development | 15/256 | 0.000325 | TFAP2C, CDSN, GRHL3, KRT5, GATA3, FOXN1, POU2F3, KRT9, ACER1, SCEL, GJB5, TGM5, FGFR3, SPRR2D, ZNF750 |
| GO:0006690 | icosanoid metabolic process | 9/88 | 0.000473 | CYP2J2;CYP2C9;PLA2G4F;GGT6;PLA2G4B;CYP4F2;CYP4F3;ALOX12B;ALOXE3 |
| GO:0016042 | lipid catabolic process | 14/232 | 0.000488 | PLA2G2F, PLA2G4F, PLA2G4D, PLA2G4E, CYP4F2, PLA2G4B, CYP4F3, SMPD3, ACER1, LIPH, LIPM, LIPK, PLCH2, PNPLA1 |
| GO:0061436 | establishment of skin barrier | 5/16 | 0.000507 | ALOX12B, ABCA12, CLDN1, ALOXE3, TP63 |

Table X. KEGG Pathway enrichment result for DU pattern of DEGs

| Term | Overlap | Adjusted P-value | Genes |
| --- | --- | --- | --- |
| Arachidonic acid metabolism | 11/63 | 5.66E-08 | PLA2G2F, CYP2J2, CYP2C9, PLA2G4F, CYP2B6, PLA2G4D, PLA2G4E, PLA2G4B, CYP4F2, CYP4F3, ALOX12B |
| Linoleic acid metabolism | 7/29 | 5.78E-06 | PLA2G2F, CYP2J2, CYP2C9, PLA2G4F, PLA2G4D, PLA2G4E, PLA2G4B |
| alpha-Linolenic acid metabolism | 5/25 | 0.00101 | PLA2G2F, PLA2G4F, PLA2G4D, PLA2G4E, PLA2G4B |
| Ovarian steroidogenesis | 6/49 | 0.00183 | CYP2J2, PLA2G4F, PLA2G4D, STAR, PLA2G4E, PLA2G4B |
| Ether lipid metabolism | 5/47 | 0.0141 | PLA2G2F, PLA2G4F, PLA2G4D, PLA2G4E, PLA2G4B |
| Serotonergic synapse | 7/113 | 0.0205 | CYP2J2, CYP2C9, PLA2G4F, PLA2G4D, PLA2G4E, PLA2G4B, ALOX12B |
| Metabolism of xenobiotics by cytochrome P450 | 5/74 | 0.0715 | ALDH3B2, CYP2C9, CYP2B6, GSTA3, UGT1A6 |
| Sphingolipid metabolism | 4/47 | 0.0787 | SMPD3, CERS3, ACER1, SGPP2 |
| Drug metabolism | 6/108 | 0.0801 | ALDH3B2, CYP2C9, CYP2B6, GSTA3, XDH, UGT1A6 |
| VEGF signaling pathway | 4/59 | 0.162 | PLA2G4F, PLA2G4D, PLA2G4E, PLA2G4B |

Table XI. GO Biological Process enrichment result for Up regulated DEGs in Normotrophic Scar VS Normal(GSE113619)

| GO ID | Term | Overlap | Adjusted P-value | Genes |
| --- | --- | --- | --- | --- |
| GO:0030198 | extracellular matrix organization | 54/359 | 1.44E-28 | COL14A1, SERPINE1, COL12A1, CYR61, LOXL2, COMP, EFEMP2, ADAMTS2, IBSP, COL10A1, POSTN, EGFL6, MMP1, MMP2, MMP3, FGG, BGN, ADAMTS20, MMP11, VCAN, SFRP2, COL2A1, MMP13, COL4A1, COL6A2, PXDN, COL6A1, COL6A3, MATN3, ENG, FBN2, FOXC2, LAMA2, COL11A1, KLK4, LTBP3, NID2, ACAN, ADAMTS14, ABI3BP, SPP1, TGFB3, FN1, SULF1, SULF2, DSPP, COL1A1, COL1A2, COL5A1, ITGA10, COL5A2, MFAP2, COL20A1, FBN1 |
| GO:0043062 | extracellular structure organization | 54/360 | 1.44E-28 | COL14A1, SERPINE1, COL12A1, CYR61, LOXL2, COMP, EFEMP2, ADAMTS2, IBSP, COL10A1, POSTN, EGFL6, MMP1, MMP2, MMP3, FGG, BGN, ADAMTS20, MMP11, VCAN, SFRP2, COL2A1, MMP13, COL4A1, COL6A2, PXDN, COL6A1, COL6A3, MATN3, ENG, FBN2, FOXC2, LAMA2, COL11A1, KLK4, LTBP3, NID2, ACAN, ADAMTS14, ABI3BP, SPP1, TGFB3, FN1, SULF1, SULF2, DSPP, COL1A1, COL1A2, COL5A1, ITGA10, COL5A2, MFAP2, COL20A1, FBN1 |
| GO:0022617 | extracellular matrix disassembly | 25/116 | 3.48E-16 | FBN2, COL14A1, COL11A1, COL12A1, KLK4, ACAN, SPP1, COL10A1, MMP1, MMP2, MMP3, FN1, COL1A1, MMP11, COL1A2, COL2A1, MMP13, COL5A1, COL4A1, COL6A2, COL5A2, COL6A1, COL6A3, FBN1, ENG |
| GO:0044243 | multicellular organismal catabolic process | 21/80 | 2.35E-15 | ACE, COL14A1, MMP1, MMP2, COL11A1, COL12A1, MMP3, COL1A1, MMP11, ADAMTS2, ADAMTS14, MMP13, COL2A1, COL1A2, COL5A1, COL4A1, COL6A2, COL6A1, COL5A2, COL10A1, COL6A3 |
| GO:0030574 | collagen catabolic process | 20/74 | 6.36E-15 | COL14A1, MMP1, MMP2, COL11A1, COL12A1, MMP3, COL1A1, MMP11, ADAMTS2, ADAMTS14, MMP13, COL2A1, COL1A2, COL5A1, COL4A1, COL6A2, COL6A1, COL5A2, COL10A1, COL6A3 |
| GO:0044259 | multicellular organismal macromolecule metabolic process | 21/89 | 1.72E-14 | ACE, COL14A1, MMP1, MMP2, COL11A1, COL12A1, MMP3, COL1A1, MMP11, ADAMTS2, ADAMTS14, MMP13, COL2A1, COL1A2, COL5A1, COL4A1, COL6A2, COL6A1, COL5A2, COL10A1, COL6A3 |
| GO:0044236 | multicellular organismal metabolic process | 21/94 | 4.69E-14 | ACE, COL14A1, MMP1, MMP2, COL11A1, COL12A1, MMP3, COL1A1, MMP11, ADAMTS2, ADAMTS14, MMP13, COL2A1, COL1A2, COL5A1, COL4A1, COL6A2, COL6A1, COL5A2, COL10A1, COL6A3 |
| GO:0032963 | collagen metabolic process | 20/83 | 4.69E-14 | COL14A1, MMP1, MMP2, COL11A1, COL12A1, MMP3, COL1A1, MMP11, ADAMTS2, ADAMTS14, MMP13, COL2A1, COL1A2, COL5A1, COL4A1, COL6A2, COL6A1, COL5A2, COL10A1, COL6A3 |
| GO:0030199 | collagen fibril organization | 15/41 | 2.55E-13 | FOXC2, COL14A1, COL11A1, COL12A1, LOXL2, COL1A1, ACAN, MMP11, ADAMTS14, ADAMTS2, COL1A2, COL2A1, SFRP2, COL5A1, COL5A2 |
| GO:0001501 | skeletal system development | 19/162 | 1.49E-07 | POSTN, COL12A1, IGF2, AEBP1, SULF1, PAPSS2, PAX1, SULF2, DSPP, COMP, COL1A1, ACAN, COL1A2, COL2A1, COL5A2, COL10A1, ARSE, MATN3, FBN1 |

Table XII. GO Biological Process enrichment result for Down regulated DEGs in Normotrophic Scar VS Normal(GSE113619)

| GO ID | Term | Overlap | Adjusted P-value | Genes |
| --- | --- | --- | --- | --- |
| GO:0031424 | keratinization | 12/47 | 3.08E-07 | LCE1A, LCE2B, LCE1B, LCE4A, LCE6A, LCE1E, EVPL, LCE1F, LCE2D, LOR, LCE1C, LCE1D |
| GO:0030182 | neuron differentiation | 15/222 | 0.0461 | BCL11B, WNT3A, WNT7B, WNT9B, WNT7A, RORA, WNT16, GDF7, NTF4, NGRN, ID4, FGFR3, WNT3, HES5, WNT4 |
| GO:0009611 | response to wounding | 13/167 | 0.0461 | SERPINB2, PLLP, TGFA, NMNAT3, KLK8, POU2F3, EREG, RTN4RL1, CYP1A1, BCL2, TSPO, FGFR3, MATN4 |
| GO:0045165 | cell fate commitment | 11/134 | 0.0608 | WNT3A, WNT7B, BCL2, WNT9B, WNT7A, WNT16, FGFR3, WNT3, HES5, WNT4, GDF7 |
| GO:0060429 | epithelium development | 15/256 | 0.131 | CALML5, SDC4, WNT7B, KDF1, KLK5, FOXJ1, EVPL, POU2F3, POU3F3, LCE2B, NTF4, FGFR3, WNT3, HES5, WNT4 |
| GO:0035588 | G-protein coupled purinergic receptor signaling pathway | 4/17 | 0.131 | ADORA2A, P2RY2, P2RY1, ADORA1 |
| GO:0061098 | positive regulation of protein tyrosine kinase activity | 5/32 | 0.131 | WNT3A, DOK7, ADORA1, TGFA, EREG |
| GO:0014014 | negative regulation of gliogenesis | 5/32 | 0.131 | ID4, TSPO, ASCL2, FGFR3, HES5 |
| GO:0022010 | central nervous system myelination | 3/9 | 0.131 | ID4, FGFR3, HES5 |
| GO:0060428 | lung epithelium development | 3/9 | 0.131 | WNT7B, FOXJ1, FGFR3 |

Table XIII. GO Biological Process enrichment result for Up regulated DEGs in Hypertrophic Scar VS Normal(GSE113619)

| GO ID | Term | Overlap | Adjusted P-value | Genes |
| --- | --- | --- | --- | --- |
| GO:0030198 | extracellular matrix organization | 71/359 | 8.08E-37 | OLFML2B, COL14A1, ELN, SERPINE1, COL12A1, TNC, SCX, PLOD2, PLOD1, CYR61, LOXL2, COMP, ADAMTS4, EFEMP2, ADAMTS2, IBSP, SH3PXD2B, COL10A1, POSTN, EGFL6, MMP2, BGN, HSPG2, ADAMTS20, MMP11, VCAN, SFRP2, COL2A1, MMP13, COL4A1, COL6A2, PXDN, COL6A1, COL8A1, COL6A3, MATN3, ENG, FBN2, FOXC2, LAMA2, COL11A1, LAMA4, KLK4, LTBP3, NID2, ACAN, ADAMTS14, ABI3BP, SPP1, TGFB1, COL24A1, TGFB3, LUM, FN1, LAMB1, SULF1, GDF5, SULF2, DSPP, COL1A1, COL3A1, COL1A2, BMP1, COL5A1, WT1, ITGA10, COL5A2, ITGA11, MFAP2, TLL2, FBN1 |
| GO:0043062 | extracellular structure organization | 71/360 | 8.08E-37 | OLFML2B, COL14A1, ELN, SERPINE1, COL12A1, TNC, SCX, PLOD2, PLOD1, CYR61, LOXL2, COMP, ADAMTS4, EFEMP2, ADAMTS2, IBSP, SH3PXD2B, COL10A1, POSTN, EGFL6, MMP2, BGN, HSPG2, ADAMTS20, MMP11, VCAN, SFRP2, COL2A1, MMP13, COL4A1, COL6A2, PXDN, COL6A1, COL8A1, COL6A3, MATN3, ENG, FBN2, FOXC2, LAMA2, COL11A1, LAMA4, KLK4, LTBP3, NID2, ACAN, ADAMTS14, ABI3BP, SPP1, TGFB1, COL24A1, TGFB3, LUM, FN1, LAMB1, SULF1, GDF5, SULF2, DSPP, COL1A1, COL3A1, COL1A2, BMP1, COL5A1, WT1, ITGA10, COL5A2, ITGA11, MFAP2, TLL2, FBN1 |
| GO:0022617 | extracellular matrix disassembly | 32/116 | 2.68E-20 | FBN2, COL14A1, ELN, COL11A1, COL12A1, KLK4, ADAMTS4, ACAN, SH3PXD2B, SPP1, COL10A1, MMP2, FN1, LAMB1, HSPG2, COL1A1, MMP11, COL3A1, COL1A2, BMP1, COL2A1, MMP13, COL5A1, COL4A1, COL6A2, COL5A2, COL6A1, COL8A1, COL6A3, TLL2, FBN1, ENG |
| GO:0030199 | collagen fibril organization | 18/41 | 5.93E-15 | FOXC2, COL14A1, LUM, COL11A1, COL12A1, SCX, LOXL2, COL1A1, ACAN, MMP11, ADAMTS14, ADAMTS2, COL3A1, COL1A2, COL2A1, SFRP2, COL5A1, COL5A2 |
| GO:0001501 | skeletal system development | 29/162 | 6.02E-13 | HOXD1, COL12A1, SCX, AEBP1, PHEX, PAPSS2, COMP, ADAMTS4, ACAN, SH3PXD2B, COL10A1, ARSE, POSTN, DMRT2, IGF2, SULF1, PAX1, SULF2, DSPP, COL1A1, COL3A1, COL1A2, BMP1, COL2A1, COL5A2, CDH11, ALPL, MATN3, FBN1 |
| GO:0044243 | multicellular organismal catabolic process | 21/80 | 1.50E-12 | ACE, COL14A1, MMP2, COL11A1, COL12A1, COL1A1, MMP11, ADAMTS2, ADAMTS14, COL3A1, MMP13, COL2A1, COL1A2, COL5A1, COL4A1, COL6A2, COL6A1, COL5A2, COL10A1, COL8A1, COL6A3 |
| GO:0030574 | collagen catabolic process | 20/74 | 3.19E-12 | COL14A1, MMP2, COL11A1, COL12A1, COL1A1, MMP11, ADAMTS2, ADAMTS14, COL3A1, MMP13, COL2A1, COL1A2, COL5A1, COL4A1, COL6A2, COL6A1, COL5A2, COL10A1, COL8A1, COL6A3 |
| GO:0001503 | ossification | 24/116 | 3.93E-12 | FOXC2, ECM1, TGFB1, TGFB3, MMP2, BMP8A, SCX, CHRDL2, HSPG2, RUNX2, CTGF, DSPP, COL1A1, IGSF10, MN1, BMP1, COL2A1, MMP13, CDH11, GNAS, SPP1, ALPL, COL10A1, CTHRC1 |
| GO:0044259 | multicellular organismal macromolecule metabolic process | 21/89 | 1.02E-11 | ACE, COL14A1, MMP2, COL11A1, COL12A1, COL1A1, MMP11, ADAMTS2, ADAMTS14, COL3A1, MMP13, COL2A1, COL1A2, COL5A1, COL4A1, COL6A2, COL6A1, COL5A2, COL10A1, COL8A1, COL6A3 |
| GO:0032963 | collagen metabolic process | 20/83 | 2.46E-11 | COL14A1, MMP2, COL11A1, COL12A1, COL1A1, MMP11, ADAMTS2, ADAMTS14, COL3A1, MMP13, COL2A1, COL1A2, COL5A1, COL4A1, COL6A2, COL6A1, COL5A2, COL10A1, COL8A1, COL6A3 |

Table XIV. GO Biological Process enrichment result for Down regulated DEGs in Hypertrophic Scar VS Normal(GSE113619)

| GO ID | Term | Overlap | Adjusted P-value | Genes |
| --- | --- | --- | --- | --- |
| GO:0031424 | keratinization | 30/47 | 4.70E-21 | SPRR2E, ABCA12, PPL, EVPL, LCE2D, TGM1, LCE1A, LCE1B, LCE3D, CASP14, LCE5A, SFN, TGM3, SPRR2D, KRT2, CNFN, LCE1E, LCE1F, LOR, LCE1C, LCE3E, LCE1D, LCE2B, LCE2C, LCE2A, KRT17, LCE4A, LCE6A, SPRR1B, IVL |
| GO:0008544 | epidermis development | 42/120 | 2.90E-17 | COL17A1, SPRR2E, CALML5, BNC1, KLK5, HOXC13, SOX21, EVPL, CST6, KLK7, NTF4, CASP14, SCEL, ALX4, TGM5, SPRR2D, DSP, TFAP2C, WNT10A, CDSN, LAMB3, KRT2, KDF1, GRHL3, KRT5, KRT31, FOXN1, POU2F3, KRT9, EDAR, LCE2B, ACER1, ELF3, DCT, KRT17, KRT16, KRT15, GJB5, KRT14, DNASE1L2, SPRR1B, ZNF750 |
| GO:0050891 | multicellular organismal water homeostasis | 19/32 | 3.93E-12 | FLG, CYP4F2, KRT1, KDF1, ALOX12B, ALOX12, ABCA12, CLDN1, CYP4F12, FLG2, SCNN1G, CLDN4, CDH1, SCNN1B, TMEM79, SCNN1A, SFN, ALOXE3, TP63 |
| GO:0030104 | water homeostasis | 20/38 | 1.32E-11 | FLG, CYP4F2, AQP9, KRT1, KDF1, ALOX12B, ALOX12, ABCA12, CLDN1, CYP4F12, FLG2, SCNN1G, CLDN4, CDH1, SCNN1B, TMEM79, SCNN1A, SFN, ALOXE3, TP63 |
| GO:0060429 | epithelium development | 52/256 | 7.04E-11 | CALML5, BNC1, HOXC13, SOX21, CASP14, TGM5, DSP, KRT2, KRT5, KRT31, POU3F3, KRT9, LCE2B, EDAR, SFRP1, ELF3, DCT, DNASE1L2, ZNF750, SPRR2E, COL17A1, SDC4, KLK5, GATA3, EVPL, CST6, KLK7, NTF4, SCEL, ALX4, WNT3, HES5, SPRR2D, WNT4, WNT10A, TFAP2C, CDSN, LAMB3, WNT7B, KDF1, FOXJ1, GRHL3, FOXN1, POU2F3, ACER1, KRT17, KRT16, KRT15, GJB5, KRT14, FGFR3, SPRR1B |
| GO:0061436 | establishment of skin barrier | 13/16 | 8.84E-11 | FLG, KRT1, KDF1, ALOX12B, ALOX12, ABCA12, CLDN1, FLG2, CLDN4, TMEM79, SFN, ALOXE3, TP63 |
| GO:0033561 | regulation of water loss via skin | 14/19 | 8.87E-11 | FLG, KRT1, KDF1, ALOX12B, ALOX12, ABCA12, CLDN1, FLG2, CLDN4, CDH1, TMEM79, SFN, ALOXE3, TP63 |
| GO:0009913 | epidermal cell differentiation | 25/76 | 1.99E-09 | FLG, CSTA, EVPL, TGM1, SCEL, TGM3, TP63, HES5, DSP, CERS3, ST14, CDSN, SPINK5, KRT10, POU3F1, OVOL1, POU2F3, FOXN1, LOR, EREG, FA2H, ACER1, IRF6, IVL, SPRR1B |
| GO:0030216 | keratinocyte differentiation | 21/54 | 2.27E-09 | DSP, CERS3, FLG, CSTA, ST14, CDSN, KRT10, POU3F1, EVPL, POU2F3, FOXN1, LOR, EREG, TGM1, SCEL, ACER1, IRF6, TGM3, TP63, IVL, SPRR1B |
| GO:0030855 | epithelial cell differentiation | 53/303 | 9.18E-09 | EHF, CTSV, F11R, SYNE4, TGM1, UPK1B, TP63, TGM3, CERS3, DSP, CBR1, MREG, KRT4, TCF15, SPINK5, OVOL1, POU3F1, KLF15, LOR, EREG, ELF3, TST, ELF5, ALDOC, IRF6, RHCG, IVL, FLG, OCA2, CSTA, DLX3, TYRP1, EVPL, SCEL, AGR2, HES5, SPDEF, WNT4, ST14, CDSN, PTK6, KRT10, FOXN1, POU2F3, GDF7, FA2H, ACER1, KRT16, KRT14, CYP1A1, BCL2, CD24, SPRR1B |

Table XV. GO Biological Process enrichment result for Up regulated DEGs in Keloid VS Normal(GSE113619)

| GO ID | Term | Overlap | Adjusted P-value | Genes |
| --- | --- | --- | --- | --- |
| GO:0030198 | extracellular matrix organization | 75/359 | 4.56E-30 | COL16A1, OLFML2B, COL14A1, SERPINE1, COL12A1, SCX, PLOD2, PLOD1, CYR61, LOXL2, COMP, ADAMTS4, EFEMP2, ADAMTS2, IBSP, SH3PXD2B, COL10A1, FGA, POSTN, COL27A1, EGFL6, MMP2, BGN, HSPG2, ADAMTS20, MMP11, VCAN, SFRP2, COL2A1, MMP13, COL6A2, PXDN, COL6A1, COL8A1, COL6A3, COL6A6, MATN3, ENG, FBN2, FOXC2, LAMA1, COL11A1, COL11A2, KLK4, LTBP3, NID2, ACAN, ADAMTS14, ABI3BP, TGFB1, COL24A1, FOXF2, FOXF1, TGFB3, LUM, FN1, SULF1, GDF5, AGT, SULF2, DSPP, COL1A1, COL3A1, COL1A2, BMP1, COL5A1, NPHS1, ITGA10, COL5A2, ITGA11, MFAP2, COL9A1, COL20A1, TLL2, FBN1 |
| GO:0043062 | extracellular structure organization | 75/360 | 4.56E-30 | COL16A1, OLFML2B, COL14A1, SERPINE1, COL12A1, SCX, PLOD2, PLOD1, CYR61, LOXL2, COMP, ADAMTS4, EFEMP2, ADAMTS2, IBSP, SH3PXD2B, COL10A1, FGA, POSTN, COL27A1, EGFL6, MMP2, BGN, HSPG2, ADAMTS20, MMP11, VCAN, SFRP2, COL2A1, MMP13, COL6A2, PXDN, COL6A1, COL8A1, COL6A3, COL6A6, MATN3, ENG, FBN2, FOXC2, LAMA1, COL11A1, COL11A2, KLK4, LTBP3, NID2, ACAN, ADAMTS14, ABI3BP, TGFB1, COL24A1, FOXF2, FOXF1, TGFB3, LUM, FN1, SULF1, GDF5, AGT, SULF2, DSPP, COL1A1, COL3A1, COL1A2, BMP1, COL5A1, NPHS1, ITGA10, COL5A2, ITGA11, MFAP2, COL9A1, COL20A1, TLL2, FBN1 |
| GO:0022617 | extracellular matrix disassembly | 32/116 | 1.23E-15 | FBN2, COL16A1, COL14A1, COL11A1, COL12A1, COL11A2, KLK4, ADAMTS4, ACAN, SH3PXD2B, COL10A1, MMP2, FN1, HSPG2, COL1A1, MMP11, COL3A1, COL1A2, BMP1, COL2A1, MMP13, COL5A1, COL6A2, COL5A2, COL6A1, COL9A1, COL8A1, COL6A3, TLL2, COL6A6, FBN1, ENG |
| GO:0030199 | collagen fibril organization | 19/41 | 1.59E-13 | FOXC2, COL14A1, LUM, COL11A1, COL12A1, COL11A2, SCX, LOXL2, COL1A1, ACAN, MMP11, ADAMTS14, ADAMTS2, COL3A1, COL1A2, COL2A1, SFRP2, COL5A1, COL5A2 |
| GO:0044243 | multicellular organismal catabolic process | 25/80 | 1.76E-13 | COL16A1, COL14A1, PLA2G1B, COL11A1, COL12A1, COL11A2, ADAMTS2, ADAMTS14, COL10A1, ACE, MMP2, COL1A1, MMP11, COL3A1, MMP13, COL2A1, COL1A2, COL5A1, COL6A2, COL6A1, COL5A2, COL9A1, COL8A1, COL6A3, COL6A6 |
| GO:0030574 | collagen catabolic process | 23/74 | 2.63E-12 | COL16A1, COL14A1, MMP2, COL11A1, COL12A1, COL11A2, COL1A1, MMP11, ADAMTS2, ADAMTS14, COL3A1, MMP13, COL2A1, COL1A2, COL5A1, COL6A2, COL6A1, COL5A2, COL9A1, COL10A1, COL8A1, COL6A3, COL6A6 |
| GO:0044236 | multicellular organismal metabolic process | 25/94 | 8.37E-12 | COL16A1, COL14A1, PLA2G1B, COL11A1, COL12A1, COL11A2, ADAMTS2, ADAMTS14, COL10A1, ACE, MMP2, COL1A1, MMP11, COL3A1, MMP13, COL2A1, COL1A2, COL5A1, COL6A2, COL6A1, COL5A2, COL9A1, COL8A1, COL6A3, COL6A6 |
| GO:0044259 | multicellular organismal macromolecule metabolic process | 24/89 | 1.75E-11 | COL16A1, ACE, COL14A1, MMP2, COL11A1, COL12A1, COL11A2, COL1A1, MMP11, ADAMTS2, ADAMTS14, COL3A1, MMP13, COL2A1, COL1A2, COL5A1, COL6A2, COL6A1, COL5A2, COL9A1, COL10A1, COL8A1, COL6A3, COL6A6 |
| GO:0032963 | collagen metabolic process | 23/83 | 2.79E-11 | COL16A1, COL14A1, MMP2, COL11A1, COL12A1, COL11A2, COL1A1, MMP11, ADAMTS2, ADAMTS14, COL3A1, MMP13, COL2A1, COL1A2, COL5A1, COL6A2, COL6A1, COL5A2, COL9A1, COL10A1, COL8A1, COL6A3, COL6A6 |
| GO:0001501 | skeletal system development | 31/162 | 7.58E-11 | HOXD1, COL12A1, COL11A2, SCX, AEBP1, PHEX, PAPSS2, GLI2, COMP, ADAMTS4, RAI1, ACAN, SH3PXD2B, COL10A1, SPP2, ARSE, POSTN, IGF2, SULF1, PAX1, SULF2, DSPP, COL1A1, COL3A1, COL1A2, BMP1, COL2A1, COL5A2, CDH11, MATN3, FBN1 |

Table XVI. GO Biological Process enrichment result for Down regulated DEGs in Keloid VS Normal(GSE113619)

| GO ID | Term | Overlap | Adjusted P-value | Genes |
| --- | --- | --- | --- | --- |
| GO:0031424 | keratinization | 21/47 | 2.80E-11 | KRT2, CNFN, LCE1E, PPL, EVPL, LCE1F, LCE2D, LOR, LCE1C, LCE3E, LCE1D, LCE1A, LCE2B, LCE1B, LCE2C, LCE2A, LCE5A, LCE4A, LCE6A, SFN, TGM3 |
| GO:0008544 | epidermis development | 29/120 | 1.33E-08 | COL17A1, CALML5, BNC1, KLK5, SOX21, EVPL, CST6, KLK7, NTF4, SCEL, TGM5, DSP, TFAP2C, WNT10A, LAMB3, KRT2, KDF1, GRHL3, KRT5, POU2F3, EDAR, LCE2B, ACER1, ELF3, DCT, KRT15, GJB5, KRT14, DNASE1L2 |
| GO:0060429 | epithelium development | 38/256 | 2.21E-05 | COL17A1, CALML5, SDC4, BNC1, KLK5, SOX21, EVPL, CST6, KLK7, NTF4, SCEL, TGM5, WNT3, HES5, WNT4, DSP, WNT10A, TFAP2C, LAMB3, KRT2, KDF1, FOXJ1, GRHL3, KRT5, POU2F3, POU3F3, LCE2B, EDAR, ACER1, SFRP1, ELF3, DCT, KRT15, GJB5, KRT14, SDC1, DNASE1L2, FGFR3 |
| GO:0016338 | calcium-independent cell-cell adhesion via plasma membrane cell-adhesion molecules | 8/22 | 0.0103 | CLDN10, CLDN4, CLDN3, CLDN8, CLDN23, CLDN7, CLDN16, CLDN1 |
| GO:0006582 | melanin metabolic process | 6/12 | 0.0103 | PMEL, DCT, TYRP1, ASIP, BCL2, TYR |
| GO:0006694 | steroid biosynthetic process | 18/108 | 0.0103 | SDR42E1, HMGCS1, SRD5A1, DHCR24, TFCP2L1, HSD17B8, TM7SF2, CYP39A1, HSD11B1, CYB5R1, STAR, HSD17B1, TSPO, MVD, DHCR7, HMGCS2, SLC27A2, WNT4 |
| GO:0003334 | keratinocyte development | 5/8 | 0.0103 | TFAP2C, BCL11B, KDF1, SFN, EXPH5 |
| GO:0030855 | epithelial cell differentiation | 35/303 | 0.0103 | EHF, DLX3, TYRP1, CTSV, F11R, EVPL, SCEL, TGM3, HES5, SPDEF, WNT4, CERS3, DSP, CBR1, ST14, MREG, PTK6, OVOL1, POU3F1, POU2F3, KLF15, LOR, EREG, GDF7, ACER1, DHRS9, ELF3, TST, ELF5, KRT14, BCL2, ALDOC, IRF6, CD24, RHCG |
| GO:0030216 | keratinocyte differentiation | 12/54 | 0.0103 | DSP, CERS3, SCEL, ACER1, ST14, IRF6, POU3F1, EVPL, POU2F3, TGM3, LOR, EREG |
| GO:1901617 | organic hydroxy compound biosynthetic process | 23/166 | 0.0126 | CDS1, PMEL, GPR37, HMGCS1, TYRP1, ASIP, BBOX1, ALOX12, DHCR24, TYR, TM7SF2, CYP39A1, CYB5R1, ACER1, STAR, DCT, IMPA2, HSD17B1, LEP, MVD, DHCR7, HMGCS2, SLC27A2 |
